# Supplementary material for: Biomimetic cellulose-based superabsorbent hydrogels for treating obesity
Source: PubMed Central journal article supplement (PMC8560814; doi:10.1038/s41598-021-00884-5), 2021-11-01
Supplement: 41598_2021_884_MOESM2_ESM.pdf [file 41598_2021_884_MOESM2_ESM.pdf]

## Supplementary Information

### BIOMIMETIC CELLULOSE-BASED SUPERABSORBENT HYDROGELS FOR TREATING OBESITY

Marta Madaghiele<sup>1\*</sup>, Christian Demitri<sup>1</sup>, Ivo Surano<sup>1</sup>, Alessandra Silvestri<sup>2</sup>, Milena Vitale<sup>2</sup>, Eliana Panteca<sup>3,4</sup>, Yishai Zohar<sup>3,4</sup>, Maria Rescigno<sup>2,5</sup>, Alessandro Sannino<sup>1\*</sup>

<sup>1</sup> Department of Engineering for Innovation, University of Salento  
Via per Monteroni, 73100 Lecce, Italy

<sup>2</sup> IRCCS Humanitas Research Hospital  
Via Manzoni 56, 20089 Rozzano, Milan, Italy

<sup>3,4</sup> Gelesis  
Boston, MA, 02116 USA & Calimera, Lecce 73021, Italy

<sup>5</sup> Department of Biomedical Sciences, Humanitas University  
Via Rita Levi Montalcini 4, 20072 Pieve Emanuele, Milan, Italy

\*Corresponding authors:

Marta Madaghiele

Department of Engineering for Innovation, University of Salento

Via per Monteroni, Lecce 73100, Italy

Email: [marta.madaghiele@unisalento.it](mailto:marta.madaghiele@unisalento.it)

Alessandro Sannino

Department of Engineering for Innovation, University of Salento

Via per Monteroni, Lecce 73100, Italy

Email: [alessandro.sannino@unisalento.it](mailto:alessandro.sannino@unisalento.it)

## 1. Supplementary Methods

### Analysis of CMC types

#### *Size exclusion chromatography (SEC)*

SEC was performed to assess the molecular weight distributions of CMC-L and CMC-H. A Waters e2695 liquid chromatograph coupled with Waters 2414 differential refractometer detector (RID) were used for the measurements. Separation was performed in two Agilent PL-aquagel-OH Mixed-H columns (300 x 7.5 mm, 8  $\mu\text{m}$  particle size) in series, preceded by Agilent PL-aquagel-OH Guard column (50 x 7.5 mm, 8  $\mu\text{m}$  particle size). A pH 7 aqueous buffer (0.2 M sodium nitrate and 0.01 M sodium phosphate monobasic dihydrate in purified water) was used as the mobile phase at a flow rate of 1 mL/min and 35°C. A calibration curve was obtained by analyzing a series of pullulan standards (Ready Cal-Kit Pullulan high, PSS Polymer Standards Service GmbH) in the molecular weight range from 6,100 to 1,220,000 g/mol, solubilized in purified water at a concentration of 0.15% w/w. CMC samples (n=4 for each type), dissolved in purified water overnight at a concentration of 0.15% w/w, were then analyzed. Data were collected and processed using the Empower3 software (Waters Corporation) to determine the weight average molecular weight ( $M_w$ ), the number average molecular weight ( $M_n$ ) and the polydispersity index ( $\text{PDI} = M_w/M_n$ ), by means of the integration algorithm ApexTrack.

#### *Rheological measurements (hysteresis loop tests)*

For each CMC type, rheological measurements on CMC solutions (2% w/v) were performed at 25°C, using a Discovery HR-1 rotational rheometer (TA Instruments) with the cone-and-plate geometry (diameter 40 mm, gap 0.026 mm). In order to evaluate the thixotropic behavior of the CMC solutions, a hysteresis loop test was carried out, which consisted of the following loading/unloading program, under controlled shear rate mode: (a) increase of the shear rate from 0.1 to 100  $\text{s}^{-1}$  in 5 minutes; (b) constant shear rate of 100  $\text{s}^{-1}$  for 1 minute; (c) decrease of the shear rate from 100 to 0.1  $\text{s}^{-1}$  in 5 minutes. Considering the plot of shear stress vs. shear rate, the upward (loading) and the downward (unloading) curves do not superimpose, with the downward curve being located below the upward one. A dimensionless thixotropic index (TI) was thus calculated as:

$$TI = \frac{A_{up} - A_{down}}{A_{up}} \times 100 \quad (\text{Eq. S1})$$

where  $A_{up}$  and  $A_{down}$  are the areas under the upward and the downward curves, respectively, and  $(A_{up} - A_{down})$  represents the hysteresis area.

## 2. Supplementary Figures (Supplementary Figs. 1-3)

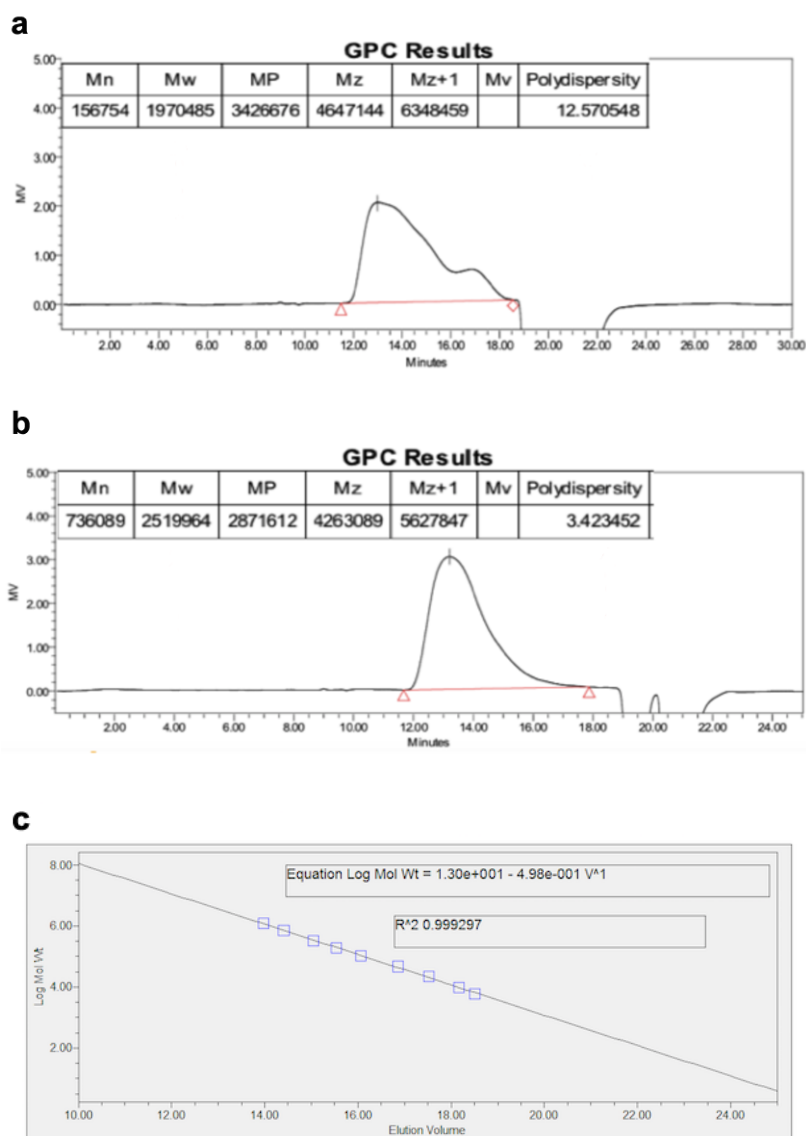

### Supplementary Fig. 1. Results of size exclusion chromatography.

Typical chromatograms of CMC-L (**a**) and CMC-H (**b**), indicating a larger  $M_w$  and a narrower molecular weight distribution of CMC-H compared to CMC-L. (**c**) Calibration curve obtained from pullulan standards and used for the analysis of the CMC samples.

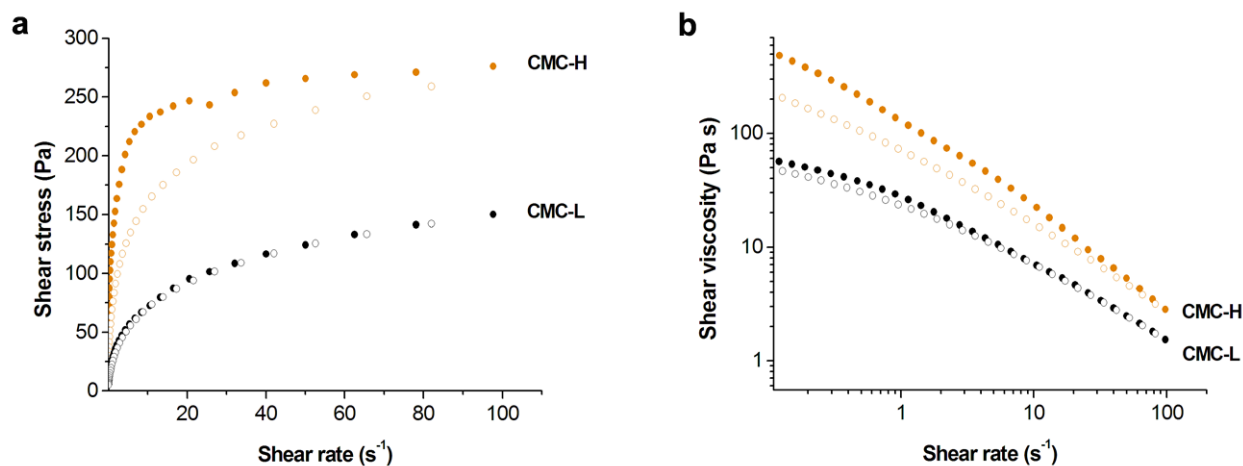

**Supplementary Fig. 2. Results of hysteresis loop tests performed on aqueous CMC solutions (2% w/v).**

Typical plots of shear stress **(a)** and shear viscosity **(b)** of CMC-L and CMC-H solutions, as a function of the shear rate: full symbols indicate the upward/loading curve, while empty symbols indicate the downward/unloading curve. The hysteresis area in **(a)** gives an idea of the extent of thixotropy, which is calculated according to Eq. S1.

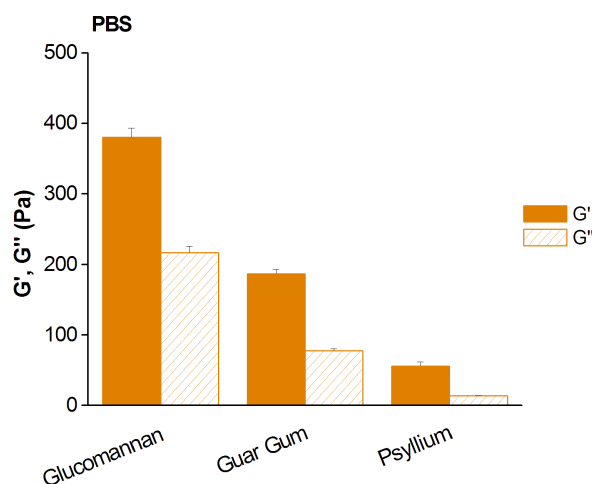

**Supplementary Fig. 3. Elastic modulus  $G'$  and viscous modulus  $G''$  (at 10 rad/s) of functional fibers upon solubilization in phosphate buffered saline (PBS) at 37°C (2% w/v).**

Results are the mean  $\pm$  SD of three independent measurements. All detected differences in elasticity ( $G'$ ) among glucomannan, guar gum and psyllium were significant ( $p < 0.0001$ ).

### 3. Supplementary Tables 1-2

**Supplementary Table 1.** Simulated Gastric Fluid (SGF), Simulated Intestinal Fluid (SIF) and Simulated Colonic Fluid (SCF) used in this study.

\* Used enzymes were pepsin (1:3000), pancreatin from porcine pancreas (8xUSP) and pectinase from *Aspergillus niger* (>1 U/mg).

|                                                          | SGF  | SIF    | SCF    |
|----------------------------------------------------------|------|--------|--------|
| <b>COMPOSITION</b>                                       |      |        |        |
| Sodium chloride (g)                                      | 2.0  | -      | -      |
| Hydrochloric acid 1 M (mL)                               | 84.0 | -      | -      |
| Purified water (mL)                                      | -    | 750.0  | 750.0  |
| Monobasic potassium phosphate (g)                        | -    | 6.8    | 6.8    |
| Sodium hydroxide 0.2 N (g)                               | -    | 117.0  | 117.0  |
| Pepsin* (g)                                              | 3.2  | -      | -      |
| Pancreatin* (g)                                          | -    | 10.0   | -      |
| Pectinase* (g)                                           | -    | -      | 10.0   |
| <i>Adjust pH and/or volume</i>                           |      |        |        |
| Sodium hydroxide 0.2 N to<br>(or hydrochloric acid 0.2N) | -    | pH 6.8 | pH 6.8 |
| Purified water to (L)                                    | 1.0  | 1.0    | 1.0    |
| <b>PROPERTIES</b>                                        |      |        |        |
| pH                                                       | 1.1  | 6.8    | 6.8    |
| Ionic strength (mM)                                      | 118  | 72     | 72     |

**Supplementary Table 2.** Simulated GI model to assess absorption (MUR) and elasticity (G') variations of the CB-SAHs at 37°C.

\* Each time point represents an individual sample (e.g. the sample tested at 120 min is previously immersed in SGF/water 1/8 up to 60 minutes and then immersed in SGF/water 1/4 for additional 60 minutes, before MUR and G' assessment).

| Simulated GI environment | Simulated GI interval (min) | Simulating GI medium | Testing time (min)* |
|--------------------------|-----------------------------|----------------------|---------------------|
| Stomach                  | 0-60                        | SGF/water 1/8        | 5                   |
|                          |                             |                      | 15                  |
|                          |                             |                      | 30                  |
|                          |                             |                      | 60                  |
|                          |                             |                      | 120                 |
| Small Intestine          | 60-120                      | SGF/water 1/4        | 180                 |
|                          | 120-180                     | SGF                  | 240                 |
|                          | 180-300                     | SIF                  | 300                 |
| Large Intestine          | 300-360                     | SCF                  | 360                 |

#### 4. Supplementary Video

**Supplementary Video 1.** Time-lapse video of the hydration of a single CB-SAH granule (GelA in SGF/water 1/8 v/v) over 10 minutes.
